# Supplementary material
Source: publisher site journal article supplement (https://www.dovepress.com/article/409017)

### **Supplementary Figure legends**

**Supplementary Figure 1 Expression of NAMPT and INSR $\beta$  in renal tissues of healthy controls and DKD patients.** Representative immunohistochemical analysis of NAMPT and INSR $\beta$  staining in healthy controls and DKD patients. Brown staining indicates the protein expression of NAMPT and INSR. Scale bar=50  $\mu$ m; The top two arrows indicate significantly increased expression of NAMPT in the renal tubulointerstitium of DKD patients, and the bottom two arrows indicate increased expression of INSR- $\beta$  in the renal innate cells of DKD patients.

# Supplementary Figure 1

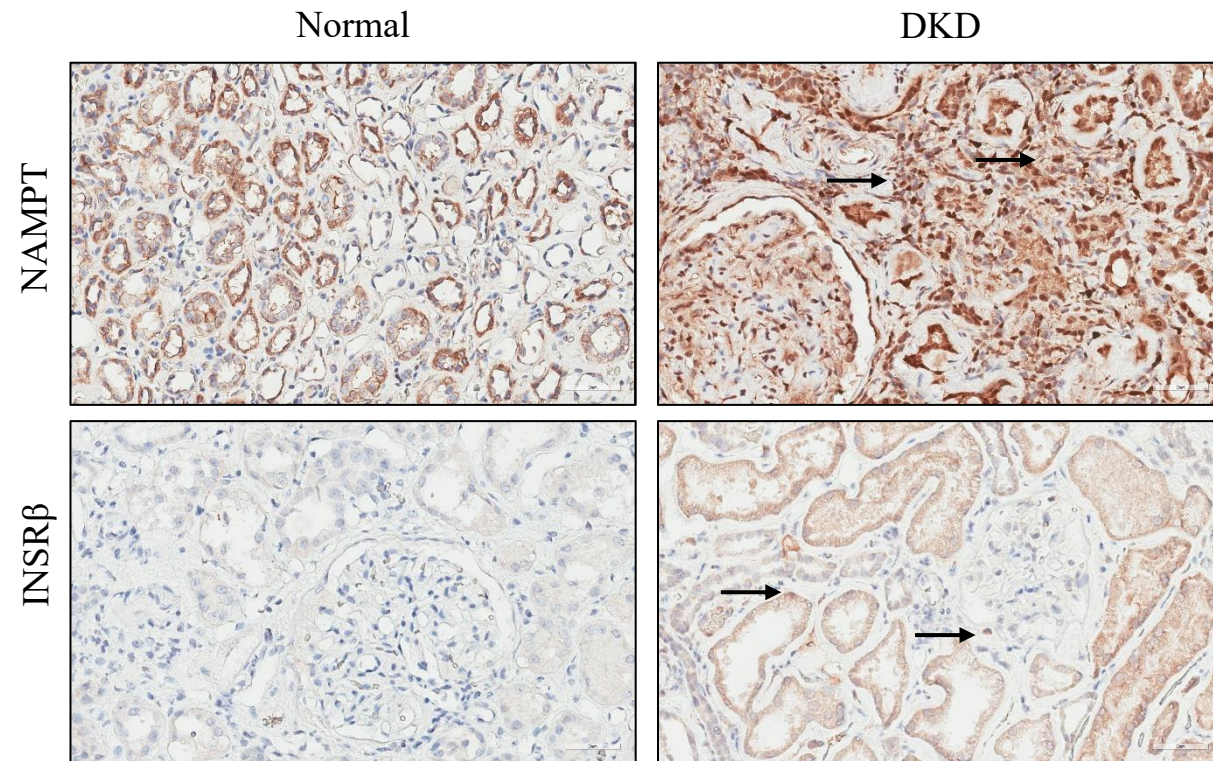

Supplement: Supplementary file 1 [file get_supplementary_file.php]
